# Supplementary material for: Prognostic Relevance of Thyroid-Hormone-Associated Proteins in Adenoid Cystic Carcinoma of the Head and Neck
Source: MDPI journal article supplement (doi:10.3390/jpm11121352), 2021-12-12
Supplement: s1 [file s1]

**Table S1.** Correlation analysis for associations between protein levels of NIS, CRYM, and THRB and clinicopathological features. Correlation was analyzed using Fisher's exact test or chi-squared test.

|                       | NIS      |          |                 | CRYM     |          |                 | THRB     |          |                 |
|-----------------------|----------|----------|-----------------|----------|----------|-----------------|----------|----------|-----------------|
|                       | Negative | Positive | <i>p</i> -Value | Negative | Positive | <i>p</i> -Value | Negative | Positive | <i>p</i> -Value |
| Gender                |          |          |                 |          |          |                 |          |          |                 |
| Female                | 8 (67%)  | 18 (58%) | 0.735           | 9 (45%)  | 17 (71%) | 0.083           | 17 (71%) | 6 (40%)  | 0.057           |
| Male                  | 4 (33%)  | 13 (42%) |                 | 11 (55%) | 7 (29%)  |                 | 7 (29%)  | 9 (60%)  |                 |
| Age                   |          |          |                 |          |          |                 |          |          |                 |
| <60                   | 2 (17%)  | 18 (58%) | 0.015           | 9 (45%)  | 12 (50%) | 0.741           | 11 (46%) | 7 (47%)  | 0.959           |
| ≥60                   | 10 (83%) | 13 (42%) |                 | 11 (55%) | 12 (50%) |                 | 13 (54%) | 8 (53%)  |                 |
| T Stage               |          |          |                 |          |          |                 |          |          |                 |
| T1-2                  | 2 (17%)  | 10 (32%) | 0.456           | 5 (25%)  | 7 (29%)  | 0.757           | 4 (17%)  | 7 (47%)  | 0.043           |
| T3-4                  | 10 (83%) | 21 (68%) |                 | 15 (75%) | 17 (71%) |                 | 20 (83%) | 8 (53%)  |                 |
| N Stage               |          |          |                 |          |          |                 |          |          |                 |
| N0                    | 9 (75%)  | 24 (77%) | 1.000           | 14 (70%) | 20 (83%) | 0.293           | 18 (75%) | 11 (73%) | 0.908           |
| N1-2                  | 3 (25%)  | 7 (23%)  |                 | 6 (30%)  | 4 (17%)  |                 | 6 (25%)  | 4 (27%)  |                 |
| M Stage               |          |          |                 |          |          |                 |          |          |                 |
| M0                    | 11 (92%) | 29 (94%) | 1.000           | 18 (90%) | 23 (96%) | 0.430           | 22 (92%) | 14 (93%) | 1.000           |
| M1                    | 1 (8%)   | 2 (6%)   |                 | 2 (10%)  | 1 (4%)   |                 | 2 (8%)   | 1 (7%)   |                 |
| Stage                 |          |          |                 |          |          |                 |          |          |                 |
| I–II                  | 2 (17%)  | 10 (36%) | 0.285           | 5 (26%)  | 7 (32%)  | 0.699           | 5 (23%)  | 6 (43%)  | 0.201           |
| III–IV                | 10 (83%) | 18 (64%) |                 | 14 (74%) | 15 (68%) |                 | 17 (77%) | 8 (57%)  |                 |
| Grading-Spiro         |          |          |                 |          |          |                 |          |          |                 |
| 1                     | 7 (58%)  | 21 (68%) | 0.610           | 13 (65%) | 16 (67%) | 0.291           | 16 (67%) | 11 (73%) | 0.859           |
| 2                     | 4 (33%)  | 9 (29%)  |                 | 5 (25%)  | 8 (33%)  |                 | 7 (29%)  | 3 (20%)  |                 |
| 3                     | 1 (8%)   | 1 (3%)   |                 | 2 (10%)  | 0 (0%)   |                 | 1 (4%)   | 1 (7%)   |                 |
| Grading-Perzin/Szanto |          |          |                 |          |          |                 |          |          |                 |
| 1                     | 4 (33%)  | 6 (19%)  | 0.483           | 5 (25%)  | 5 (21%)  | 0.277           | 6 (25%)  | 3 (20%)  | 1.000           |
| 2                     | 5 (42%)  | 19 (61%) |                 | 9 (45%)  | 16 (67%) |                 | 13 (54%) | 9 (60%)  |                 |
| 3                     | 3 (25%)  | 6 (19%)  |                 | 6 (30%)  | 3 (13%)  |                 | 5 (21%)  | 3 (20%)  |                 |
| Perineural Invasion   |          |          |                 |          |          |                 |          |          |                 |
| No                    | 7 (58%)  | 15 (48%) | 0.558           | 12 (60%) | 11 (46%) | 0.349           | 14 (58%) | 5 (33%)  | 0.129           |
| Yes                   | 5 (42%)  | 16 (52%) |                 | 8 (40%)  | 13 (54%) |                 | 10 (42%) | 10 (67%) |                 |
| Lymphatic Invasion    |          |          |                 |          |          |                 |          |          |                 |
| No                    | 10 (83%) | 27 (87%) | 1.000           | 17 (85%) | 21 (88%) | 1.000           | 20 (83%) | 14 (93%) | 0.631           |
| Yes                   | 2 (17%)  | 4 (13%)  |                 | 3 (15%)  | 3 (13%)  |                 | 4 (17%)  | 1 (7%)   |                 |
